# Supplementary material for: Increased Noise Levels Have Different Impacts on the Anti-Predator Behaviour of Two Sympatric Fish Species
Source: PLoS One. 2014 Jul 24;9(7):e102946. doi: 10.1371/journal.pone.0102946 (PMC4109949; doi:10.1371/journal.pone.0102946)
Supplement: Data File S1 — Anti-predator response data. This file contains all data collected on occurrence of response and latency to respond to a visual predatory stimulus of all European minnows and three-spined sticklebacks included in the study. (XLS) [file pone.0102946.s001.xls]

## Sheet: Table S1
ID	video	observation	species	experiment_order	treatment	response_occurred	response_latency_sec
1	10	1	stickleback	1	ship	1	0.267
1	10	2	stickleback	2	ambient	1	0.523
2	11	3	stickleback	1	ambient	1	0.604
2	11	4	stickleback	2	ship	1	0.364
3	13	5	stickleback	1	ambient	0	NA
3	13	6	stickleback	2	ship	1	0.232
4	15	7	stickleback	1	ambient	1	0.363
4	15	8	stickleback	2	ship	1	0.164
5	17	9	stickleback	1	ambient	1	0.159
5	17	10	stickleback	2	ship	1	0.356
6	18	11	stickleback	1	ship	1	0.3
6	18	12	stickleback	2	ambient	1	0.19
7	22	13	stickleback	1	ambient	1	0.595
7	22	14	stickleback	2	ship	1	0.234
8	24	15	stickleback	1	ship	1	0.414
8	24	16	stickleback	2	ambient	0	NA
9	25	17	stickleback	1	ambient	1	0.472
9	25	18	stickleback	2	ship	1	0.592
10	28	19	stickleback	1	ship	0	NA
10	28	20	stickleback	2	ambient	1	NA
11	30	21	stickleback	1	ship	1	0.19
11	30	22	stickleback	2	ambient	1	0.5
12	31	23	stickleback	1	ambient	1	0.38
12	31	24	stickleback	2	ship	1	0.18
13	33	25	stickleback	1	ship	1	0.496
13	33	26	stickleback	2	ambient	0	NA
14	37	27	stickleback	1	ship	1	0.254
14	37	28	stickleback	2	ambient	1	0.66
15	40	29	stickleback	1	ship	1	0.603
15	40	30	stickleback	2	ambient	1	0.54
16	44	31	stickleback	1	ship	0	NA
16	44	32	stickleback	2	ambient	1	0.44
17	47	33	stickleback	1	ship	1	0.42
17	47	34	stickleback	2	ambient	1	0.44
18	53	35	stickleback	1	ship	1	NA
18	53	36	stickleback	2	ambient	0	NA
19	55	37	stickleback	1	ship	1	0.2
19	55	38	stickleback	2	ambient	1	0.44
20	56	39	stickleback	1	ship	1	0.42
20	56	40	stickleback	2	ambient	1	0.28
21	57	41	stickleback	1	ambient	1	0.234
21	57	42	stickleback	2	ship	1	0.495
22	59	43	stickleback	1	ambient	1	0.432
22	59	44	stickleback	2	ship	1	0.08
23	60	45	stickleback	1	ambient	1	0.57
23	60	46	stickleback	2	ship	0	NA
24	62	47	stickleback	2	ambient	1	0.469
25	63	48	stickleback	1	ambient	0	NA
25	63	49	stickleback	2	ship	1	0.49
26	69	50	stickleback	1	ship	1	0.55
26	69	51	stickleback	2	ambient	1	0.44
27	72	52	stickleback	1	ambient	1	0.24
27	72	53	stickleback	2	ship	1	0.24
28	75	54	stickleback	1	ship	1	0.2
28	75	55	stickleback	2	ambient	1	0.36
29	80	56	stickleback	1	ship	1	0.35
29	80	57	stickleback	2	ambient	1	0.407
30	81	58	stickleback	1	ambient	1	0.513
30	81	59	stickleback	2	ship	1	0.3
24	84	60	stickleback	1	ship	1	0.409
31	85	61	stickleback	1	ambient	1	0.41
31	85	62	stickleback	2	ship	1	0.24
32	92	63	stickleback	1	ambient	1	0.56
32	92	64	stickleback	2	ship	1	0.16
33	93	65	stickleback	1	ambient	0	NA
33	93	66	stickleback	2	ship	1	0.475
34	94	67	stickleback	1	ship	1	0.37
34	94	68	stickleback	2	ambient	1	0.2
35	26	69	stickleback	1	ambient	1	NA
35	26	70	stickleback	2	ship	1	0.21
36	11	71	minnow	1	ambient	1	0.287
36	11	72	minnow	2	ship	1	0.32
37	14	73	minnow	1	ambient	1	0.395
37	14	74	minnow	2	ship	1	0.229
38	21	75	minnow	1	ambient	1	0.49
38	21	76	minnow	2	ship	1	0.572
39	23	77	minnow	1	ambient	1	0.579
39	23	78	minnow	2	ship	0	NA
40	26	79	minnow	1	ambient	1	0.545
40	26	80	minnow	2	ship	0	NA
41	28	81	minnow	1	ship	1	0.506
41	28	82	minnow	2	ambient	1	0.18
42	29	83	minnow	1	ambient	1	0.213
42	29	84	minnow	2	ship	0	NA
43	31	85	minnow	1	ship	0	NA
43	31	86	minnow	2	ambient	1	0.727
44	33	87	minnow	1	ambient	1	0.608
44	33	88	minnow	2	ship	1	0.591
45	38	89	minnow	1	ship	1	0.274
45	38	90	minnow	2	ambient	0	NA
46	42	91	minnow	1	ship	1	0.555
46	42	92	minnow	2	ambient	1	0.239
47	43	93	minnow	1	ambient	0	NA
47	43	94	minnow	2	ship	0	NA
48	47	95	minnow	1	ship	0	NA
48	47	96	minnow	2	ambient	1	0.398
49	49	97	minnow	1	ship	0	NA
49	49	98	minnow	2	ambient	0	NA
50	54	99	minnow	1	ambient	1	0.606
50	54	100	minnow	2	ship	1	0.626
51	57	101	minnow	1	ship	0	NA
51	57	102	minnow	2	ambient	1	NA
52	64	103	minnow	1	ship	0	NA
52	64	104	minnow	2	ambient	0	NA
53	67	105	minnow	1	ambient	0	NA
53	67	106	minnow	2	ship	1	0.372
54	69	107	minnow	1	ship	0	NA
54	69	108	minnow	2	ambient	0	NA
55	70	109	minnow	1	ambient	0	NA
55	70	110	minnow	2	ship	1	0.24
56	71	111	minnow	1	ship	1	0.56
56	71	112	minnow	2	ambient	1	0.252
57	81	113	minnow	1	ship	0	NA
57	81	114	minnow	2	ambient	0	NA
58	85	115	minnow	1	ambient	0	NA
58	85	116	minnow	2	ship	0	NA
59	88	117	minnow	1	ship	1	0.48
59	88	118	minnow	2	ambient	0	NA
60	92	119	minnow	1	ambient	0	NA
60	92	120	minnow	2	ship	0	NA
61	95	121	minnow	1	ship	0	NA
61	95	122	minnow	2	ambient	1	0.523
62	98	123	minnow	1	ship	0	NA
62	98	124	minnow	2	ambient	1	0.334
